# Supplementary material
Source: PubMed Central journal article supplement (PMC9077377)
Supplement: mmc1.pdf [file mmc1.pdf]

YMTHE, Volume 30

## **Supplemental Information**

**Increased expression of HOXA11-AS attenuates  
endometrial decidualization in recurrent  
implantation failure patients**

**Hanting Zhao, Shuanggang Hu, Jia Qi, Yuan Wang, Ying Ding, Qinling Zhu, Yaqiong He, Yao Lu, Yue Yao, Shiyao Wang, Yanzhi Du, and Yun Sun**

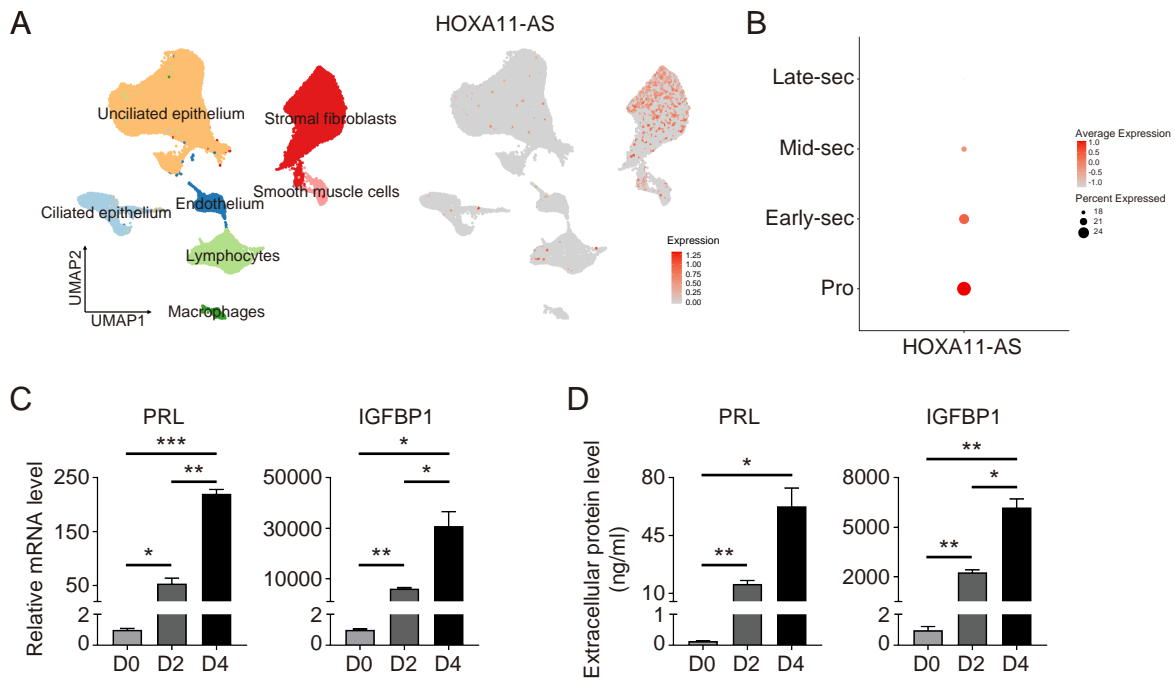

**Figure S1. The expression of HOXA11-AS in single-cell dataset and the establishment of *in vitro* decidualization model**

(A) Dimension reduction (uniform manifold approximation and projection (UMAP) on top PCs) and HOXA11-AS expression on all the single cells in 10× dataset. (B) Dynamics of HOXA11-AS stratified by stromal fibroblasts across menstrual cycle in 10× dataset. Pro: proliferative; sec: secretory. (C) qRT-PCR showing relative mRNA levels of two decidualization biomarkers PRL and IGFBP1 during *in vitro* decidualization (n=4, One-way ANOVA, Bonferroni test). (D) Extracellular protein levels of two decidualization biomarkers PRL and IGFBP1 during *in vitro* decidualization (n=4, One-way ANOVA, Bonferroni test). Error bars represent SEMs, and the data represent at least 3 independent experiments. \*\*\*:  $p < 0.001$ , \*\*:  $p < 0.01$ , \*:  $p < 0.05$ .

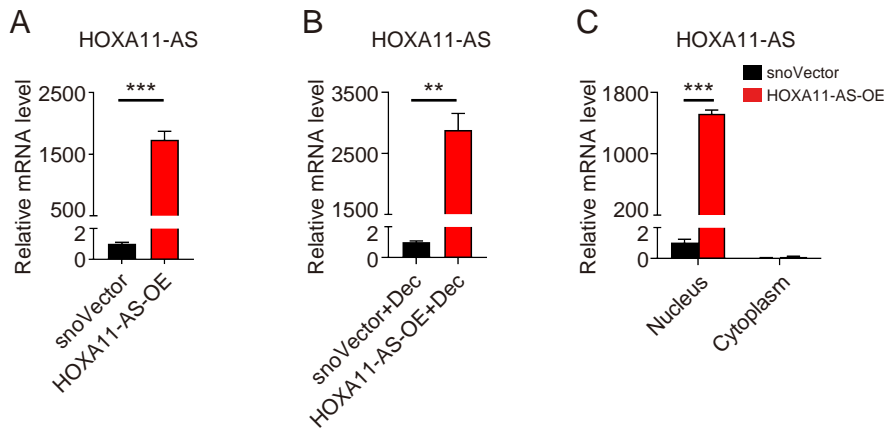

**Figure S2. Overexpression efficiency of HOXA11-AS in hESCs**

(A) qRT-PCR assays were conducted to detect HOXA11-AS expression in hESCs transfected with snoVector or HOXA11-AS nuclear overexpression plasmid (HOXA11-AS-OE) (n=7, Student's t-test). (B) qRT-PCR assays were conducted to detect the overexpression efficiency of HOXA11-AS in hESCs under *in vitro* decidualization for 4 days (n=4, Student's t-test). Dec: decidualization. (C) qRT-PCR assays were performed to examine HOXA11-AS expression in the nuclear and cytoplasmic fractions of hESCs transfected with snoVector or HOXA11-AS-OE (n=3, Student's t-test). Error bars represent SEMs, and the data represent at least 3 independent experiments. \*\*\*: p < 0.001, \*\*: p < 0.01.

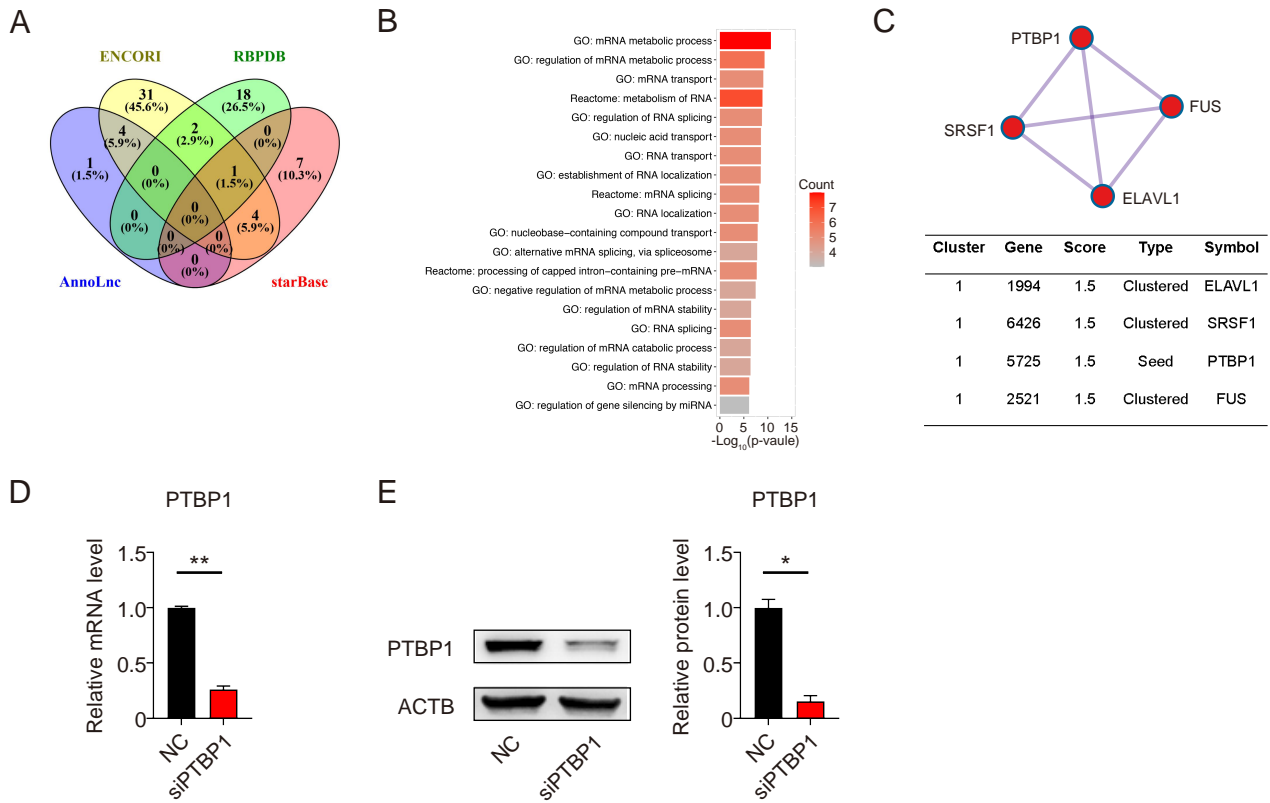

**Figure S3. Prediction of potential binding proteins of HOXA11-AS**

(A) Venn diagram illustrating the intersections of potential interacting proteins of HOXA11-AS predicted by AnnoLnc, ENCORI, RBPDB, and starBase. (B) Pathway enrichment analysis of 11 potential interacting proteins at least shared by two databases of AnnoLnc, ENCORI, RBPDB, and starBase. (C) Four proteins (ELAVL1, SRSF1, PTBP1, and FUS) aggregated into one MCODE network using Metascape software. In particular, the PTBP1 protein played a seed role in the network. (D) qRT-PCR showing relative PTBP1 mRNA levels after transfection with NC or siPTBP1 ( $n=3$ , Student's *t*-test). (E) Representative Western blotting images and statistical analysis of PTBP1 after transfection with NC or siPTBP1 ( $n=3$ , Student's *t*-test). Error bars represent SEMs, and the data represent at least 3 independent experiments. \*\*:  $p < 0.01$ , \*:  $p < 0.05$ .

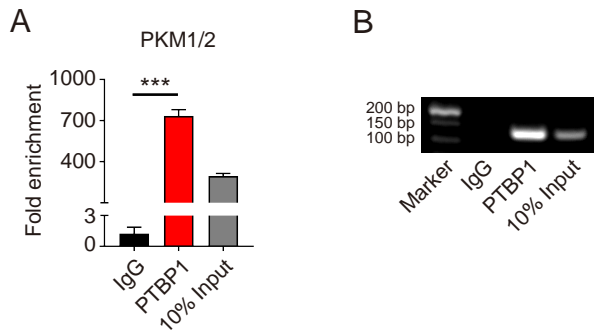

**Figure S4. PTBP1 binds to PKM1/2 mRNA**

(A) Enrichment of PKM1/2 mRNA by PTBP1 RIP in hESCs was determined by qRT-PCR. Normal rabbit Immunoglobulin G (IgG) was used as a negative control (n=3, One-way ANOVA, Bonferroni test). (B) Agarose gel electrophoresis of RIP qRT-PCR products. Error bars represent SEMs, and the data represent at least 3 independent experiments. \*\*\*:  $p < 0.001$ .

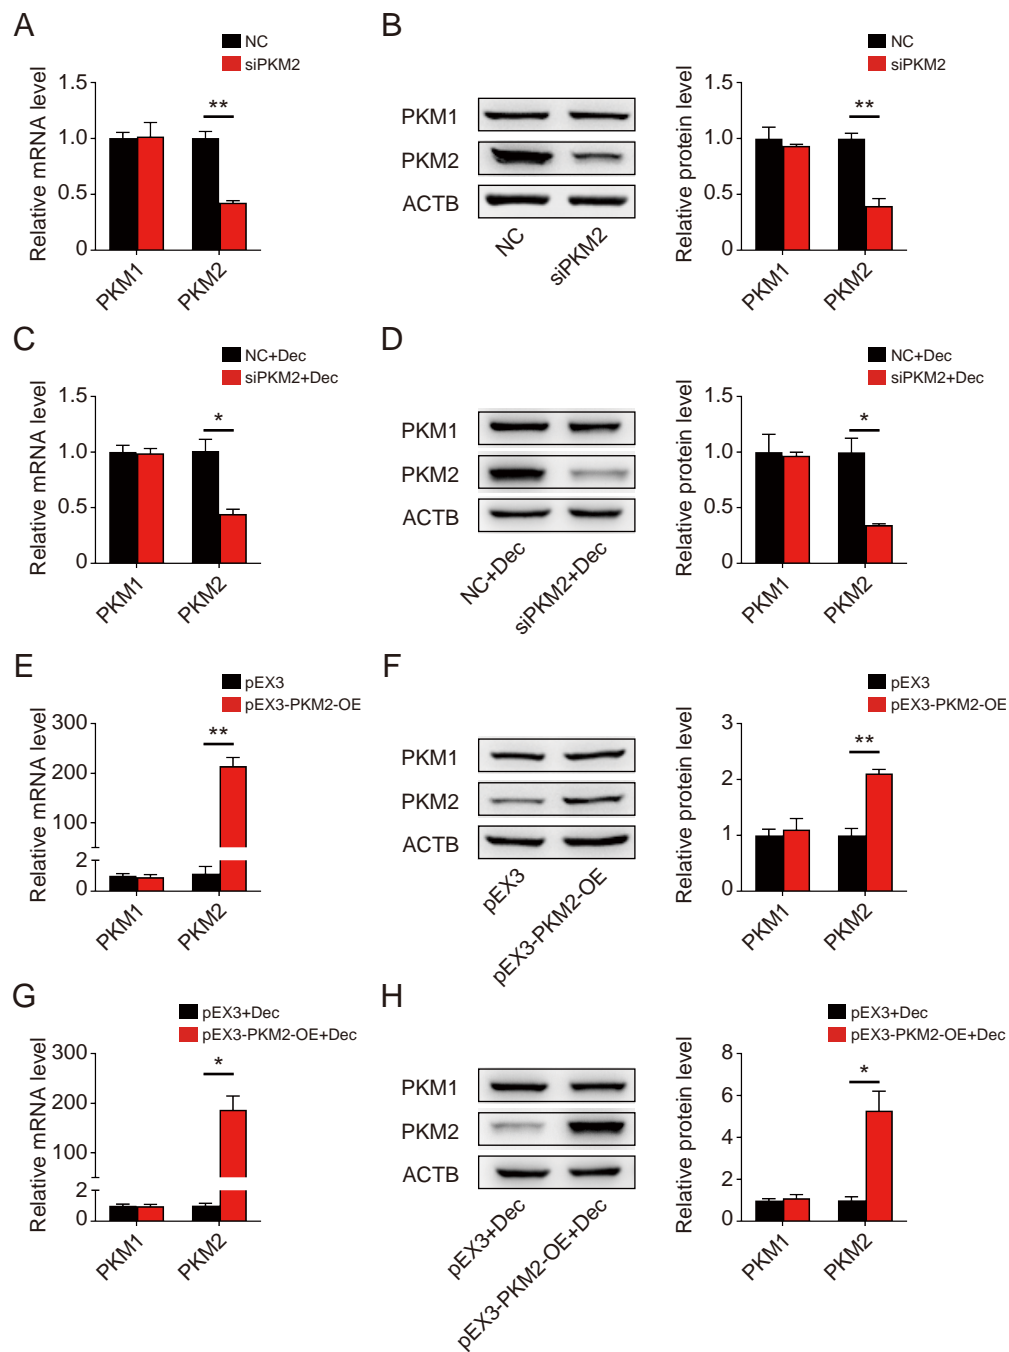

**Figure S5. Knockdown and overexpression efficiency of PKM2 in hESCs**

(A) qRT-PCR showing relative PKM1 and PKM2 mRNA levels after transfection with NC or siPKM2 (n=4, Student's t-test). (B) Representative Western blotting images and statistical analysis of PKM1 and PKM2 in hESCs after transfection with NC or siPKM2 (n=4, Student's t-test). (C) qRT-PCR showing relative PKM1 and PKM2 mRNA levels after transfection with NC or siPKM2 under *in vitro* decidualization for 4 days (n=3, Student's t-test). Dec: decidualization. (D) Representative Western blotting images and statistical analysis of PKM1 and PKM2 in hESCs after transfection with NC or siPKM2 under *in vitro* decidualization for 4 days (n=3, Student's t-test). (E) qRT-PCR results of relative PKM1 and PKM2 mRNA levels after transfection with pEX3 or pEX3-PKM2-OE (n=3, Student's t-test). (F) Representative Western blotting images and statistical analysis of PKM1 and PKM2 after transfection with pEX3 or pEX3-PKM2-OE (n=3, Student's t-test). (G) qRT-PCR results of relative PKM1 and PKM2 mRNA levels after transfection with pEX3 or pEX3-PKM2-OE under *in vitro* decidualization for 4 days (n=3, Student's t-test). (H) Representative Western blotting images and statistical analysis of PKM1 and PKM2 after transfection with pEX3 or pEX3-PKM2-OE under *in vitro* decidualization for 4 days (n=3, Student's t-test). Error bars represent SEMs, and the data represent at least 3 independent experiments. \*\*:  $p < 0.01$ , \*:  $p < 0.05$ .

A

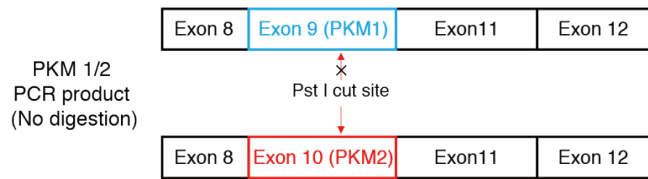

B

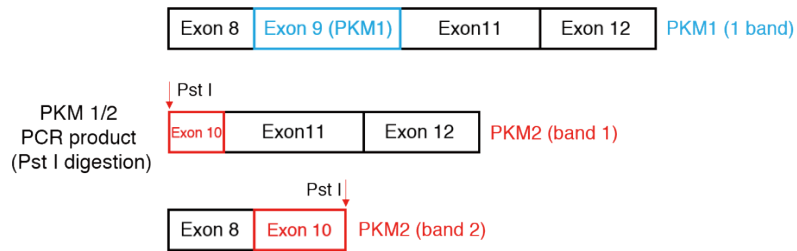

**Figure S6. The schematic diagram of PKM alternative splicing analysis**

(A) PKM 1/2 PCR product using universal primers without PstI digestion. (B) one band for PKM1 and two bands for PKM2 after PstI digestion.

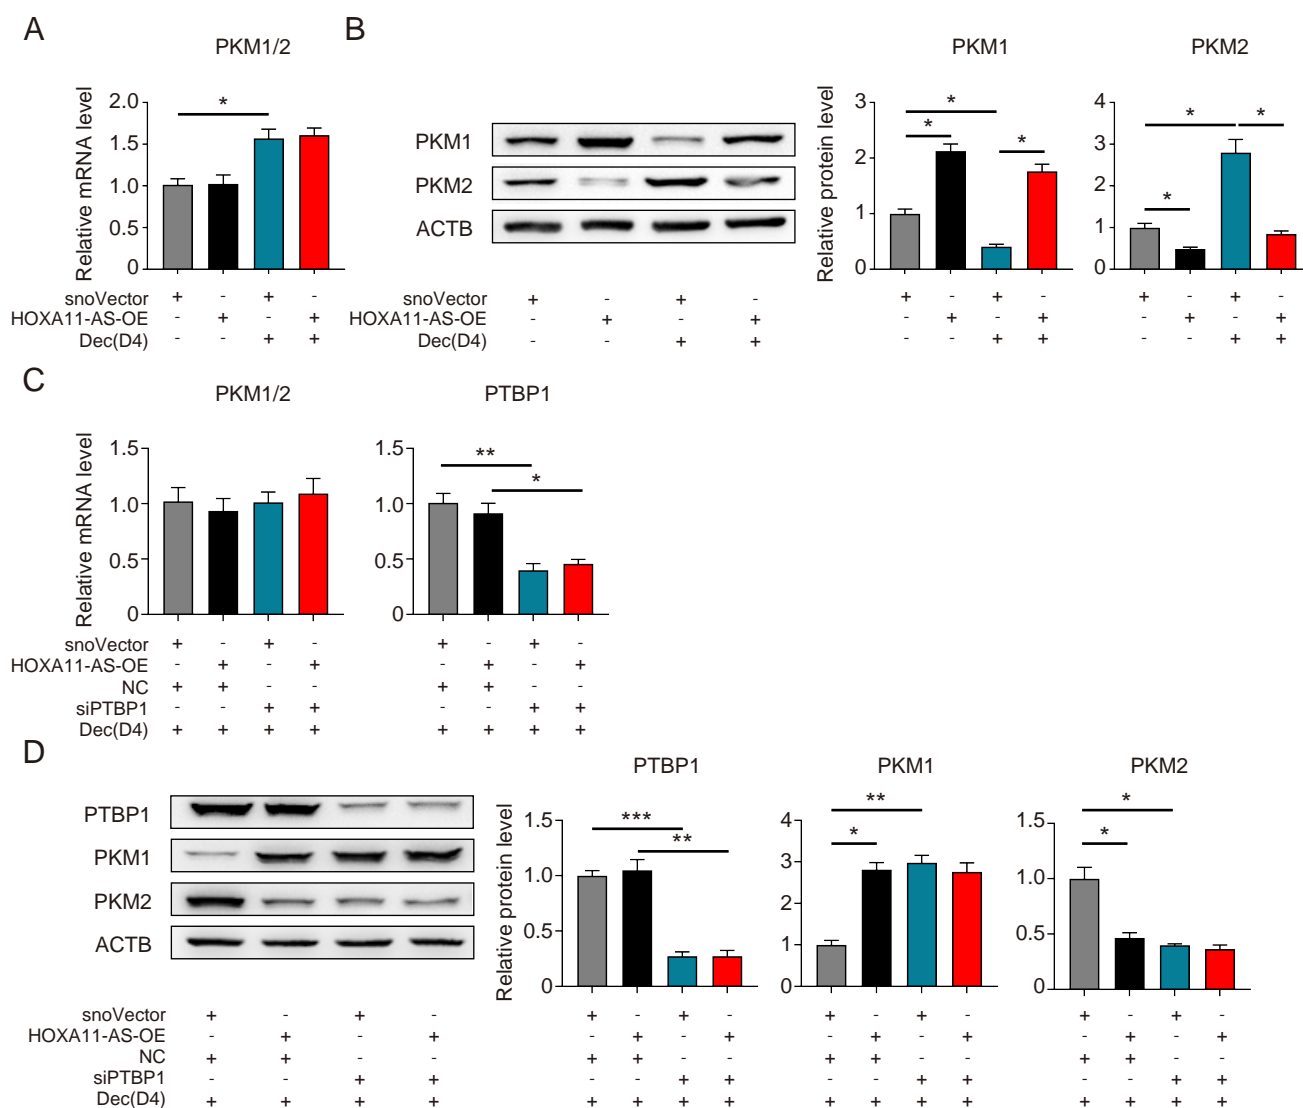

**Figure S7. HOXA11-AS regulates PKM1 and PKM2 dependent on PTBP1**

(A) qRT-PCR showing relative mRNA levels of PKM1/2 after transfection with snoVector or HOXA11-AS-OE with or without *in vitro* decidualization (Dec) for 4 days (n=7, One-way ANOVA, Bonferroni test). (B) Representative Western blotting images and statistical analysis of PKM1 and PKM2 after transfection with snoVector or HOXA11-AS-OE with or without *in vitro* decidualization for 4 days. (n=4, One-way ANOVA, Bonferroni test). (C) qRT-PCR showing relative mRNA levels of PKM1/2 and PTBP1 after PTBP1 knockdown or HOXA11-AS overexpression as indicated with *in vitro* decidualization for 4 days (n=4, One-way ANOVA, Bonferroni test). (D) Representative Western blotting images and statistical analysis of PTBP1, PKM1 and PKM2 after PTBP1 knockdown or HOXA11-AS overexpression as indicated with *in vitro* decidualization for 4 days (n=4, One-way ANOVA, Bonferroni test). Error bars represent SEMs, and the data represent at least 3 independent experiments. \*\*\*: p < 0.001, \*\*: p < 0.01, \*: p < 0.05.



**Table S1. Potential HOXA11-AS interacting proteins predicted by 4 databases**

| Database (number) | Potential interacting proteins                                                                                                                                                                                                                                                                               |
|-------------------|--------------------------------------------------------------------------------------------------------------------------------------------------------------------------------------------------------------------------------------------------------------------------------------------------------------|
| AnnoLnc (5)       | FMR1, PTBP1, CPSF1, CSTF2T, SRSF1                                                                                                                                                                                                                                                                            |
| ENCORI (42)       | CNBP, CSTF2T, DDX54, DGCR8, DICER1, DKC1, EIF4A3, ELAVL1, EWSR1, FBL, FMR1, FUS, HNRNPA1, HNRNPC, HNRNPK, IGF2BP3, KHDRBS2, LARP4B, LIN28, LIN28A, MOV10, NOP56, NOP58, NUMA1, PTBP1, QKI, RANGAP1, RBFOX2, RBM10, RNF219, RTCB, SRSF1, SRSF3, SRSF7, TIAL1, U2AF2, UPF1, VIM, YTHDC1, YTHDF1, ZFP36, ZNF184 |
| RBPDB (21)        | NCL, SNRPA, NONO, PABPC1, RBMY1A1, a2bp1, EIF4B, FUS, Pum2, SFRS9, MBNL1, Vts1, KHSRP, YBX1, YTHDC1, RBMX, SFRS13A, RBM4, SFRS1, ELAVL1, KHDRBS3                                                                                                                                                             |
| starBase (12)     | HuR, PTB, IGF2BP3, eIF4AIII, DGCR8, FMRP, FUS, C22ORF28, FUS-mutant, U2AF65, TIAL1, UPF1                                                                                                                                                                                                                     |

**Table S2. Baseline characteristics of LH+2 and LH+7 patients**

| Clinical features        | LH+2 (n=4)    | LH+7 (n=4)    | p value |
|--------------------------|---------------|---------------|---------|
| Age (years)              | 26.00 ± 3.65  | 29.25 ± 2.99  | 0.217   |
| BMI (kg/m <sup>2</sup> ) | 21.25 ± 1.60  | 20.06 ± 1.31  | 0.295   |
| Basal FSH level (IU/L)   | 5.80 ± 1.55   | 7.58 ± 2.37   | 0.257   |
| Basal LH level (IU/L)    | 3.65 ± 0.85   | 3.83 ± 1.39   | 0.827   |
| Basal E2 level (pg/ml)   | 68.04 ± 26.14 | 54.50 ± 35.52 | 0.562   |

The data are presented as mean ± SD and analyzed with Student's t-test. BMI, body mass index; FSH, follicle stimulating hormone; LH, luteinizing hormone; E2, estradiol.

**Table S3. Baseline characteristics of control and recurrent implantation failure patients**

| Clinical features        | CTRL (n=11)  | RIF (n=11)    | p value |
|--------------------------|--------------|---------------|---------|
| Age (years)              | 27.64 ± 1.91 | 28.55 ± 2.30  | 0.325   |
| BMI (kg/m <sup>2</sup> ) | 20.63 ± 2.54 | 21.98 ± 2.44  | 0.219   |
| Basal FSH level (IU/L)   | 6.17 ± 0.88  | 5.75 ± 1.49   | 0.432   |
| Basal LH level (IU/L)    | 4.50 ± 1.46  | 5.44 ± 2.13   | 0.241   |
| Basal E2 level (pg/ml)   | 38.42 ± 8.98 | 36.92 ± 10.18 | 0.718   |

The data are presented as mean ± SD and analyzed with Student's t-test. CTRL, control; RIF, recurrent implantation failure; BMI, body mass index; FSH, follicle stimulating hormone; LH, luteinizing hormone; E2, estradiol.

**Table S4. Primer sequences**

| <b>Gene name (species)</b>                               | <b>Forward primer sequence<br/>(5'-3')</b> | <b>Backward primer sequence<br/>(5'-3')</b> |
|----------------------------------------------------------|--------------------------------------------|---------------------------------------------|
| <b>ACTB (Homo sapiens)</b>                               | CATGTACGTTGCTATCCAGGC                      | CTCCTTAATGTCACGCACGAT                       |
| <b>HOXA11-AS (Homo sapiens)</b>                          | CACCCATCTGCCTGGTCTTCTG                     | GGCTAAGCTCGGCTGTTGGAC                       |
| <b>EPCAM (Homo sapiens)</b>                              | AATCGTCAATGCCAGTGTACTT                     | TTCATCGCAGTCAGGATCATAA                      |
| <b>VIM (Homo sapiens)</b>                                | AGTCCACTGAGTACCGGAGAC                      | CATTTCACGCATCTGGCGTTC                       |
| <b>U6 (Homo sapiens)</b>                                 | CTCGCTTCGGCAGCACA                          | AACGCTTCACGAATTTGCGT                        |
| <b>PRL (Homo sapiens)</b>                                | GGAGCAAGCCCAACAGATGAA                      | GGCTCATTCCAGGATCGCAAT                       |
| <b>IGFBP1 (Homo sapiens)</b>                             | TTGGGACGCCATCAGTACCTA                      | TTGGCTAAACTCTCTACGACTCT                     |
| <b>HOXA10 (Homo sapiens)</b>                             | CTTCCGAGAGCAGCAAAGCCTC                     | TCCAGTGTCTGGTCTTCGTGT                       |
| <b>HOXA11 (Homo sapiens)</b>                             | TGCCAAGTTGTACTTACTACGTC                    | GTTGGAGGAGTAGGAGTATGTCA                     |
| <b>EMX2 (Homo sapiens)</b>                               | GTCATCCACCGTACCGATAT                       | TTCTCAAAGGCGTGTTCAGCC                       |
| <b>ITGB3 (Homo sapiens)</b>                              | CATGGATTCCAGCAATGTCCTCC                    | TTGAGGCAGGTGGCATTGAAGG                      |
| <b>LIF (Homo sapiens)</b>                                | AGATCAGGAGCCAACCTGGCACA                    | GCCACATAGCTTGTCCAGGTTG                      |
| <b>MMP2 (Homo sapiens)</b>                               | AGCGAGTGGATGCCGCCTTTAA                     | CATTCCAGGCATCTGCGATGAG                      |
| <b>MMP9 (Homo sapiens)</b>                               | GCCACTACTGTGCCTTTGAGTC                     | CCCTCAGAGAATCGCCAGTACT                      |
| <b>PTBP1 (Homo sapiens)</b>                              | AGCGCGTGAAGATCCTGTTC                       | CAGGGGTGAGTTGCCGTAG                         |
| <b>PKM1/2 (Homo sapiens)</b>                             | CATTGATTCACCACCCATCA                       | AGACGAGCCACATTATTCC                         |
| <b>PKM1 (Homo sapiens)</b>                               | GGACTATCCTCTGGAGGCTGTG                     | CATGAGGTCTGTGGAGTGACTTG                     |
| <b>PKM2 (Homo sapiens)</b>                               | TCTGGAGAAACAGCCAAAGGG                      | GGGGTCGCTGGTAATGGG                          |
| <b>PKM (Homo sapiens) for PCR<br/>and PstI digestion</b> | GAGAAACAGCCAAAGGGGACTATC                   | CATCACGGCACAGGAACAACAC                      |

**Table S5. siRNAs sequences used for transfection**

| <b>Gene name (species)</b>  | <b>Sense (5'-3')</b>  | <b>Antisense (5'-3')</b> |
|-----------------------------|-----------------------|--------------------------|
| <b>NC (Homo sapiens)</b>    | UUCUCCGAACGUGUCACGUTT | ACGUGACACGUUCGGAGAATT    |
| <b>PKM2 (Homo sapiens)</b>  | UCCUUAAGUGCUGCAGUGTT  | CACUGCAGCACUUGAAGGATT    |
| <b>PTBP1 (Homo sapiens)</b> | GCACAGUGUUGAAGAUCAUTT | AUGAUCUUAACACUGUGCTT     |

**Table S6. Primary antibodies used for Western blotting**

| <b>Protein</b>   | <b>Manufacturer</b>       | <b>Catalog number</b> | <b>Dilution</b> |
|------------------|---------------------------|-----------------------|-----------------|
| <b>HOXA10</b>    | Santa Cruz Biotechnology  | sc-17158              | 1:200           |
| <b>HOXA11</b>    | Santa Cruz Biotechnology  | sc-393440             | 1:100           |
| <b>PTBP1</b>     | Cell Signaling Technology | 57246                 | 1:2000          |
| <b>Lamin A/C</b> | Cell Signaling Technology | 4777                  | 1:2000          |
| <b>PKM1</b>      | Cell Signaling Technology | 7067                  | 1:1000          |
| <b>PKM2</b>      | Cell Signaling Technology | 4053                  | 1:1000          |
| <b>GAPDH</b>     | Proteintech Group Inc     | 60004-1-Ig            | 1:10000         |
| <b>ACTB</b>      | Proteintech Group Inc     | 20536-1-AP            | 1:10000         |
